# Supplementary figures and images for: Temporal trends in hyperuricaemia among adults in Wuhan city, China, from 2010 to 2019: a cross-sectional study
Source: HighWire-hosted journal article supplement (doi:10.1136/bmjopen-2020-043917), 2021-03-01

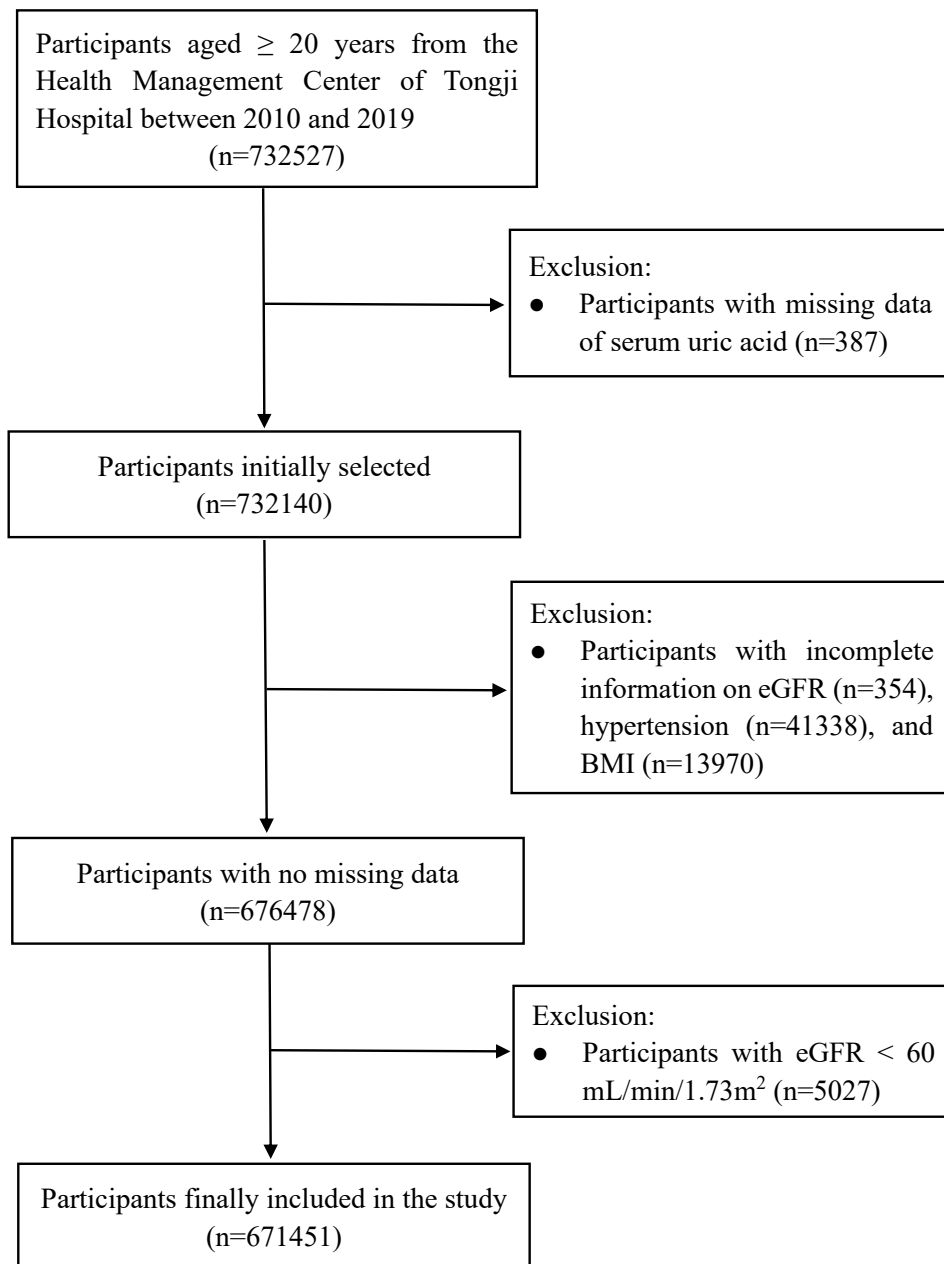

Supplemental Figure 1. Flow chart for selection of the study participants.

Supplement: bmjopen-2020-043917supp001_data_supplement.pdf [file bmjopen-2020-043917supp001_data_supplement.pdf]
